# Supplementary material for: Instance maps as an organising concept for complex experimental workflows as demonstrated for (nano)material safety research
Source: publisher site journal article supplement (doi:10.3762/bjnano.16.7), 2025-01-22
Supplement: Additional file 1 [file 2190-4286-16-7-S1.pdf]

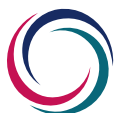

## Supporting Information

for

### **Instance maps as an organising concept for complex experimental workflows as demonstrated for (nano)material safety research**

Benjamin Punz, Maja Brajnik, Joh Dokler, Jaleesia D. Amos, Litty Johnson, Katie Reilly, Anastasios G. Papadiamantis, Amaia Green Etxabe, Lee Walker, Diego S. T. Martinez, Steffi Friedrichs, Klaus M. Weltring, Nazende Günday-Türelı, Claus Svendsen, Christine Ogilvie Hendren, Mark R. Wiesner, Martin Himly, Iseult Lynch and Thomas E. Exner

*Beilstein J. Nanotechnol.* **2025**, *16*, 57–77. [doi:10.3762/bjnano.16.7](https://doi.org/10.3762/bjnano.16.7)

### **Overview of lessons learned by applying the InstanceMaps tool**
